# Supplementary material for: Facile fabrication of PANI/g-C3N4/MXene composites as electrode materials for supercapacitors
Source: Royal Society of Chemistry journal article supplement (doi:10.1039/d3nj00943b), 2023-01-01
Supplement: d3nj00943b1.pdf [file d3nj00943b1.pdf]

## Supplementary Information

### Facile fabrication of PANI/g-C<sub>3</sub>N<sub>4</sub>/MXene composites as electrode materials for supercapacitors

Hangming Xie,<sup>a, b</sup> Zhibiao Guo,<sup>a</sup> Mingkun Wang,<sup>a</sup> Shiyu Ma,<sup>a</sup> Zhe Kong,<sup>a</sup> Zhiwei He<sup>a\*</sup>

<sup>a</sup>Center for Advanced Optoelectronic Materials, Anti-Icing Materials (AIM) Laboratory, College of Materials and Environmental Engineering, Hangzhou Dianzi University, Hangzhou 310018, China

<sup>b</sup>School of Electronics and Information, Hangzhou Dianzi University, Hangzhou 310018, China

Correspondence and requests for materials should be addressed to Z.H. (email: zhiwei.he@hdu.edu.cn)

**Table S1** A comparison of electrochemical performances of g-C<sub>3</sub>N<sub>4</sub> or MXene related materials

**Fig. S1** The CV curves of PANI, PC and PCM at 50 mV/s.

**Table S1** A comparison of electrochemical performances of g-C<sub>3</sub>N<sub>4</sub> or MXene related materials

| Materials                                                       | Eelectrolytes                      | Potential window | Specific capacity      | Cyclic stability                     | Ref.      |
|-----------------------------------------------------------------|------------------------------------|------------------|------------------------|--------------------------------------|-----------|
| PANI/g-C <sub>3</sub> N <sub>4</sub>                            | 1 M H <sub>2</sub> SO <sub>4</sub> | -0.2~1.2 V       | 584.3 F/g<br>(1 A/g)   | 81.91% after 1000 cycles (at 1 A/g)  | 1         |
| g-C <sub>3</sub> N <sub>4</sub> /Ti <sub>3</sub> C <sub>2</sub> | 1 M H <sub>2</sub> SO <sub>4</sub> | -0.8~0.2 V       | 552 F/g<br>(2 mV/s)    | 97 % after 10000 cycles (at 3 A/g)   | 2         |
| Ag/PANI/g-C <sub>3</sub> N <sub>4</sub>                         | 1 M H <sub>2</sub> SO <sub>4</sub> | -0.2~0.8 V       | 797.8 F/g<br>(1 A/g)   | 84.43 % after 1000 cycles (at 1 A/g) | 3         |
| PANI@MXene-CNTs                                                 | 3 M H <sub>2</sub> SO <sub>4</sub> | 0~0.55 V         | 463 F/g<br>(5 mV/s)    | 92% after 10000 cycles (at 10 A/g)   | 4         |
| MXene/PANI                                                      | 1 M H <sub>2</sub> SO <sub>4</sub> | -0.2~0.6 V       | 556.2 F/g<br>(0.5 A/g) | 91.6% after 5000 cycles (at 5 A/g)   | 5         |
| PCM                                                             | 1 M H <sub>2</sub> SO <sub>4</sub> | -0.2~0.8 V       | 570 F/g<br>(5 mV/s)    | 91.1% after 1000 cycles (at 10 A/g)  | This work |

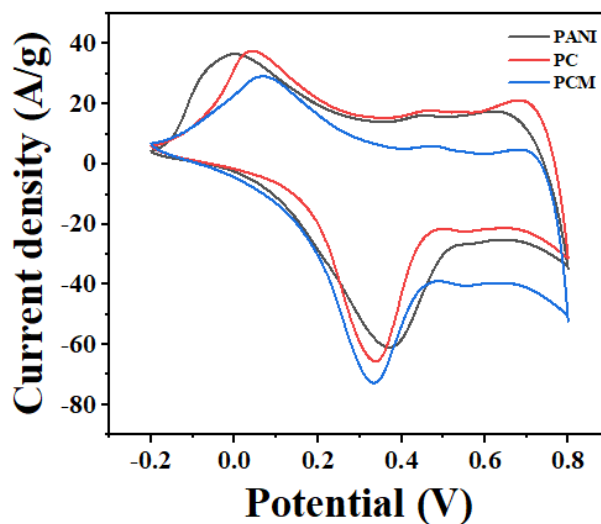

Fig. S1 The CV curves of PANI, PC and PCM at 50 mV/s.

## References

1. S.-X. Zhou, X.-Y. Tao, J. Ma, L.-T. Guo, Y.-B. Zhu, H.-L. Fan, Z.-S. Liu and X.-Y. Wei, *Vacuum*, 2018, **149**, 175-179.
2. G. Xu, D. Gong, L. Yang, Y. Zheng, Y. Yue, B. Wu, Y. Feng, T. Li, W. Zhang and X. Jiang, *Int. J. Energ. Res.*, 2022, **46**, 13308-13315.
3. J. Ma, X.-Y. Tao, S.-X. Zhou, X.-Z. Song, G. Lin, W. Yao, Y.-B. Zhu, L.-T. Guo, Z.-S. Liu, H.-L. Fan and X.-Y. Wei, *J. Electroanal. Chem.*, 2019, **835**, 346-353.
4. J. Yan, C. E. Ren, K. Maleski, C. B. Hatter, B. Anasori, P. Urbankowski, A. Sarycheva and Y. Gogotsi, *Adv. Funct. Mater.*, 2017, **27**, 1701264.
5. H. Xu, D. Zheng, F. Liu, W. Li and J. Lin, *J. Mater. Chem. A*, 2020, **8**, 5853-5858.
